# Supplementary material
Source: Springer Nature journal article supplement (https://www.springermedizin.de/resource/supplementary/12955_2012_957_MOESM3_ESM.pdf/9558840)
Supplement: MOESM3 [file 9558840]

Translation and cultural adaptation of the questionnaire

Obtaining permissions for use of questionnaires

Forward translation:  
Three independent English – Serbian  
QUALEFFO-41 translations

Merging of all translated versions into one

Back translation (two translators not familiar  
with the research concept):  
The two independent Serbian - English  
QUALEFFO-41 translations

All translations and original questionnaire were  
reviewed and compared:  
Creation of the first Serbian QUALEFFO-41  
version

Pre-validation study - cognitive debriefing

Cultural adaptation of the items

Potential new Serbian version of the QUALEFFO-41

Validation study (case-control)

The final Serbian version of the QUALEFFO-41 questionnaire
